# Supplementary material
Source: Springer Nature journal article supplement (https://www.springermedizin.de/resource/supplementary/12885_2008_1288_MOESM9_ESM.pdf/9471656)

Delta Ct

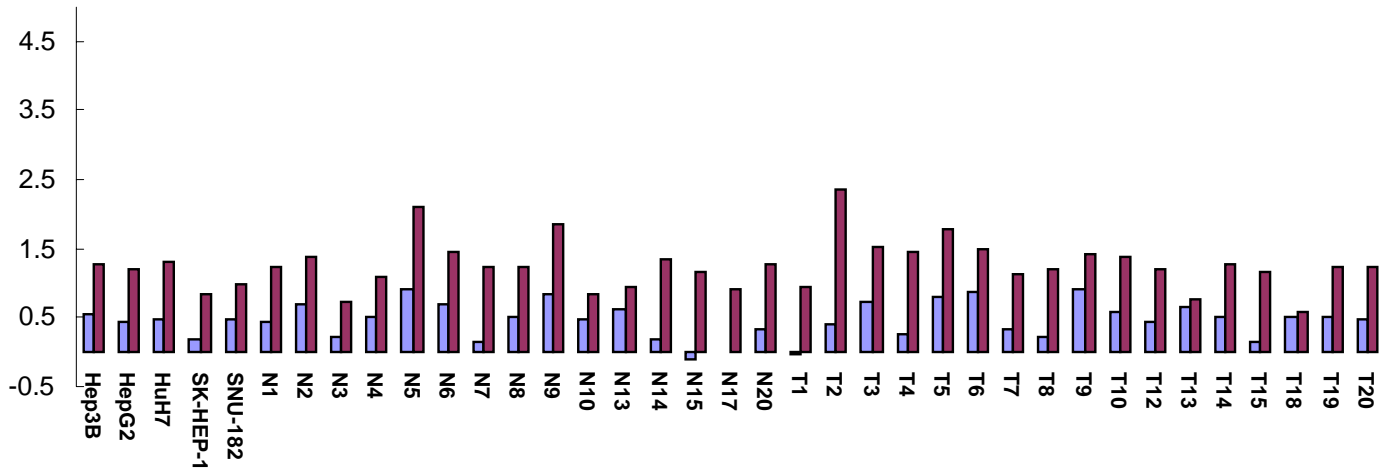

Samples

20ng RNA 100ng RNA

Supplement: MOESM9 [file 9471656]
